# Monitoring G-quadruplex formation with DNA carriers and solid-state nanopores

*Filip Bošković, Jinbo Zhu<sup>‡</sup>, Kaikai Chen<sup>‡</sup>, Ulrich F. Keyser\**

Cavendish Laboratory, University of Cambridge, JJ Thompson Avenue, Cambridge, CB3 0HE,  
United Kingdom

## ABSTRACT

G-quadruplexes (Gq) are guanine-rich DNA structures formed by single-stranded DNA. They are of paramount significance to gene expression regulation, but also drug targets for cancer and human viruses. Current ensemble and single-molecule methods require fluorescent labels, which can affect Gq folding kinetics. Here we introduce, a single-molecule Gq nanopore assay (smGNA) to detect Gqs and kinetics of Gq formation. We use ~5 nm solid-state nanopores to detect various Gq structural variants attached to designed DNA carriers. Gqs can be identified by localizing their positions along designed DNA carriers establishing smGNA as a tool for Gq mapping. In addition, smGNA allows for discrimination of (un-)folded Gq structures, provides insights into single-molecule kinetics of G-quadruplex folding, and probes quadruplex-to-duplex structural transitions. smGNA can elucidate the formation of G-quadruplexes at the single-molecule level without labelling and has potential implications on the study of these structures both in single-stranded DNA and in genomic samples.

**Keywords:** nanopores, G-quadruplex, smGNA, single-molecule detection, telomere, quadruplex-duplex competition

DNA is the information carrier in the cell and usually forms a right-handed double helix. Beyond the helix, unusual noncanonical structures can naturally occur in a guanine-rich strand of DNA.<sup>1</sup> These structures known as G-quadruplexes (Gq) are formed from three G-tetrads by forming hydrogen bonds among guanines and stabilized by monovalent ions. More specifically, Gqs tend to form in  $[G_3N_X]_4$  sequences, where four guanines form so-called G-tetrads and three of these tetrads form the full Gq.<sup>2</sup> For structure stabilization, monovalent or divalent ions are needed, and most of Gqs have the highest specificity for potassium  $K^+$ .<sup>3</sup> Over recent years, there are numerous studies that show the paramount significance of Gqs for the regulation of gene expression.<sup>4-7</sup> Hundreds of thousands of these structures were experimentally found in many vital regions of the human genome including but not limited to gene promoters, splicing sites, 3' and 5' untranslated regions (UTRs).<sup>8</sup> Secondly, Gq is shown to be on the basis of many genetic diseases including cancers.<sup>9,10</sup> Therefore, they are promising drug targets for cancers and effective targets for Ebola and HIV.<sup>11,12</sup>

The two main questions for Gqs are, first, if they are folded, and secondly, how stable they are.<sup>13,14</sup> A variety of methods, such as circular dichroism (CD), UV-melting analysis, nuclear magnetic resonance (NMR), polymerase stop assay, dimethyl sulfate (DMS) footprinting are able to distinguish folded and unfolded Gqs.<sup>2</sup> Even though those methods are widely used they usually require a large amount of sample. In parallel to the already discussed ensemble methods, various single-molecule approaches were applied to study Gqs.<sup>15-17</sup> Widely used to observe Gqs is single-molecule fluorescence resonance energy transfer (smFRET)<sup>18,19</sup> but similar to many bulk assays smFRET requires fluorescent labelling. A handful of studies pioneered an alternative single-

molecule approach based on detection of Gqs with biological nanopores.<sup>20,21</sup> Similar studies used the same approach to detect if Gqs are folded with silicon nitride nanopores.<sup>22,23</sup> Here, detection is based on the physical interaction of Gq with the nanopore, again affecting Gq formation. When monitoring competition of Gq DNA and Watson-Crick DNA,<sup>24-27</sup> fluorescent labeling might affect Gq formation and hence the ratio between Gq and duplex. Understanding Gq formation in the presence of a complementary, competing strand is of great importance for the understanding of Gq formation especially in double-stranded genomic DNA.

In order to create a label-free approach for the analysis of Gqs we combine solid-state nanopore based resistive-pulse sensing and DNA nanotechnology. Glass nanopores are pulled using a P2000 laser puller (Sutter, USA) and assembled in PDMS chips (detailed protocols are presented in section 1 of the Supporting Information). Depending on the experiments we fabricate glass nanopores with diameters ranging from ~5nm to 15 nm. Smaller pores with diameters in the range of 5 nm are used for direct detection of Gq attached to DNA carrier<sup>28</sup> while larger diameters ~15 nm allow for investigating the quadruplex-duplex competition with streptavidin-labelled strands.<sup>29</sup> Characteristics of glass nanopores, including their IV curves, used in this study can be found in section 5 of the Supporting Information. The diameter of glass nanopores is double-checked regularly with a scanning electron microscope (SEM) to confirm the resistance values provide accurate size estimates (Figure S-1 of the Supporting Information).

As proof-of-principle for the functionality of smGNA, we designed 190 short oligonucleotides (position named as 1 to 190) that are complementary to linearized single-stranded M13 DNA carrier (for more details see sections 2.1 and 2.2 of the Supporting Information). Oligonucleotides at desired positions can be replaced with short DNA strands containing Gq-sequences at the 3' end. The three types of Gqs used in this paper are shown in Figure 1a (full

sequences of the oligonucleotides are detailed in section 2.3 of the Supporting Information). We choose Gqs which are known to inhibit HIV-1 integrase (T30695)<sup>30</sup>, and to form in human telomeres (hTel)<sup>31</sup> and minisatellite tandem repeats (26CEB)<sup>32</sup>. We placed a single Gq in the middle of a DNA carrier (Figure 1b). After assembly of DNA carriers following an established protocol<sup>31</sup> and purification from unbounded oligonucleotides, the sample is diluted in a measurement buffer that always contains a salt concentration of 4 M LiCl, and 0-100 mM KCl, 10 mM Tris-HCl (pH=8.0), 1 mM EDTA and other small molecules as indicated in the respective parts of the manuscript. A diluted sample is incubated for two hours before nanopore measurement unless stated otherwise. The sample is then added to a solid-state nanopore with a diameter of ~5nm. As expected, the presence of one Gq is indicated by a single additional downward peak at or near the designed position. Figure 1c shows one exemplary ionic current trace. The Gq peak current drop ( $\Delta I_{\text{peak}}$ ) is determined from each event as it is shown in Figure 3c. Custom-written python-based analysis software firstly detects peaks on DNA and after that calculates the relative position of peaks from the closest end of the DNA carrier (more information for data analysis can be found in section 4 of the Supporting Information).

Using bulk measurements, we confirmed the successful formation of all three Gqs using circular dichroism (CD) in the typical measurement buffer (4 M LiCl, 1×TE) with 100 mM KCl (Figure 1d, more information in section 3 of the Supporting Information). Observed CD spectra indicate that Gqs are folded only in presence of 100 mM KCl and in the same conditions with 0 mM KCl Gqs are not folded (Figure S-2), what is in accordance with previously reported data.<sup>26,32,33</sup> Many groups have investigated the effect of LiCl on Gq folding and find a range of effects both destabilizing<sup>34</sup> and neutral.<sup>8,17,35</sup>

After confirmation that smGNA can detect one Gq on the DNA carrier, we expand our system. For this purpose, we distribute several Gqs-sequences along the DNA carrier (Figure 2a-c, left panel). Firstly, we designed the DNA carrier with T30695 Gq-sequences ( $[(G_3T)_4]$ ) at the 3' end of oligonucleotides in the relative positions at 60, 75, and 87% of the DNA carrier. The nanopores successfully detected our designed construct (Figure 2a, left panel) and relative position of peaks appearing at the designed positions (right panel in Figure 2a). The results for hTel and 26CEB are presented in Figure 2b and 2c, respectively. Again, we observe the Gqs at the expected positions along the carriers. However, the current difference in the current drops among all Gq sequences (Figure 2a-c, middle panel) overlap for all types of Gq. One reason is the variable nanopore diameter. It is important to note that we can clearly detect Gq based on their relative position to one end of a DNA carrier.

We further apply smGNA for studying of folding kinetics of T30695 Gq. Firstly, we designed a DNA carrier with six Gqs as shown in Figure 3a. We purified DNA carriers in 10 mM Tris-HCl (pH=8.0), 1 mM EDTA and absence of monovalent and divalent ions. Previous research concluded that in these conditions Gq is not formed.<sup>36</sup> For the control experiment, we incubated DNA carrier in measurement buffer with 100 mM KCl, to ensure that all Gqs are folded. The nanopore measurement is done in the same measuring buffer containing 100 mM KCl. Obtained data match the expectations, we observe six downward peaks each corresponding to one folded Gq (Figure 3a, Figure S-5 of the Supporting Information).

In order to investigate if smGNA can be used to monitor Gq folding kinetics, we incubated DNA carriers with six bound T30695 Gqs in a measurement buffer with 0 mM KCl. Without potassium we again observe six peaks, but with significantly higher  $\Delta I_{\text{peak}}$  (Figure 3b,  $t=0$  min). We suspected that these peaks represent unfolded Gqs. To prove that we detect unfolded Gqs, we

added 100 mM KCl in solution and continuously monitored DNA carrier translocations over time. It can be observed that after three minutes more than half of Gqs are folded (Figure 3b,  $t=3$  min). Even after ten minutes, we are still able to detect unfolded Gqs (Figure 3a,  $t=10$  min). Finally, after thirty minutes all Gqs are folded and peaks with higher  $\Delta I_{\text{peak}}$  vanished (Figure 3a,  $t=30$  min). We confirmed the results by repeating measurements of Gq folding for three different nanopores. For all repeats, we plotted  $\Delta I_{\text{peak}}$  and two distinct populations can be observed (Figure 3c). The population with lower  $\Delta I_{\text{peak}}$  we ascribe to folded Gqs, while the population with higher  $\Delta I_{\text{peak}}$  represents unfolded Gqs. We summarized single-molecule Gq folding kinetics for the three nanopores in Figure 3d. The curves were fitted to one-phase exponential decay function using OriginPro 2018. Observed values for folding rate constant for pores 1, 2, and 3, are 0.39, 0.37, and  $0.27 \text{ min}^{-1}$ , respectively. The differences in the folding rates are within the expected inter-nanopore variability. As mentioned before, deep peaks are caused by unfolded Gq i.e. ssDNA and low peaks are folded Gqs. These experiments represent the first label-free and translocation-based measurement of Gq folding kinetics for solid-state nanopores.

Finally, we expanded our method by investigating quadruplex-duplex binding competition sensing. For this purpose, we used 5' biotinylated complementary strands of Gq (complementary strand sequences are shown in Table S-2 of the Supporting Information). In the presence of equimolar concentrations of Gq and complementary strand, we assembled three different DNA carriers for the three Gqs (Figure 4a, Figure S-6 of the Supporting Information). Carriers were purified in 10 mM Tris-HCl, pH= 8.0, 0.5 mM  $\text{MgCl}_2$  and after purification stabilizing solution is added as described in section 2.1 of the Supporting Information. For these experiments, we used larger nanopores ( $\sim 15$  nm) as mentioned before, which are easier and faster to fabricate. For larger nanopores, we have to amplify the signal by binding of monovalent streptavidin to the biotinylated

complementary strands. With the larger nanopores smGNA detects duplex-biotin-streptavidin (duplex-sb) complex however label-free detection of Gqs is not possible. In this study, we used a monovalent streptavidin with only one biotin active binding site<sup>37</sup> which was proven to be easily detectable with larger nanopores.<sup>29</sup> As before, all carriers have three Gqs attached along the DNA carriers (Figure 4a), and hence we can expect a maximum of three peaks which then represent the presence of duplex-sb. The absence of any of designed peaks we attribute to the presence of folded Gq. Sample events for all three DNA carrier designs are presented in Section 6 of the Supporting Information.

For each of the three Gq structures, two sets of experiments were conducted. In the first set, we favored Gq over duplex formation by assembly of a DNA carrier in Gq-stabilizing conditions i.e. in the presence of 100 mM KCl and 1  $\mu$ M pyridostatin (PDS). Results indicate that Gq formation is favored in these conditions compared to duplex-sb for all three carriers (Figure 4b-d). We calculated the percentage of observed peaks (duplex-sb) for all three designs and around 90% are in the form of Gq (Figure 4b-d). In the second set of experiments, the same DNA carrier designs were assembled without stabilizing conditions. Example events with three peaks for all three designs are shown in the Supporting Information and the calculated percentage of total observed peaks are presented in Figure 4b-d for direct comparison with Gq formed samples. For all three Gq we see that the number of observed peaks is increasing with removal of KCl and PDS indicating fewer folded Gqs in all cases. Our results are in line with established results as it has been shown that quadruplex-duplex competition can be altered by Gq ligands.<sup>38</sup> PDS is known as a Gq-stabilizing ligand.<sup>39</sup> Our results show that, as expected, together PDS and potassium ions prefer Gq over duplex formation .

It is important to note that without potassium ions and PDS, Gqs are still formed. In the case of T30695 Gq, we observed that without stabilizing condition one third of Gq-sequences form duplexes. This is an expected result as for T30695-Gq only in multiple times excess of complementary strand the duplex fully forms.<sup>33</sup> The hTel Gq without stabilizing conditions indicates increased duplex formation and observed peaks were 79% of all possible peaks. Hence, around 21% of Gqs are folded which is again in accordance with the fluorescent experiments for the same sequence in the presence of 10 mM MgCl<sub>2</sub>.<sup>26</sup> Finally, 26CEB showed similar results as for T30695, which can be ascribed to almost identical sequence except for the long loop region. Still, the percentage of folded Gqs is smaller compared to T30695. We demonstrated that smGNA can be applied for studying Gq-duplex competition using streptavidin and biotinylated complementary strands as signal amplifiers in larger nanopores. This is a valuable advantage of smGNA for studying Gq formation in dsDNA. smGNA avoids usage of labelling, Gq-binding dyes, and high concentrations compare to other methods applied for detection quadruplex-duplex competition.<sup>26,40,41</sup>

In conclusion, we introduced an innovative single-molecule assay to study G-quadruplex formation in single-stranded DNA and Gq-duplex competition. The smGNA overcomes the necessity of labelling as one of the vital limitations of currently used methods. The smGNA can detect various Gqs and discriminate them based on the designed position along DNA carriers. Secondly, we show that smGNA can discriminate unfolded from folded Gq. Further, we show results for the single-molecule T30695 Gq folding kinetics in the presence of potassium. Finally, smGNA was employed to study Gq-duplex competition. In the presence of stabilizing conditions (100 mM KCl and 1 $\mu$ M PDS) Gq formation is favored over canonical basepairing of a DNA duplex. While without KCl and PDS, equilibrium is shifted closer to duplex formation. Our single-



molecule technique will contribute to a better understanding of G-quadruplex formation inside both single-stranded DNA and double-stranded DNA.

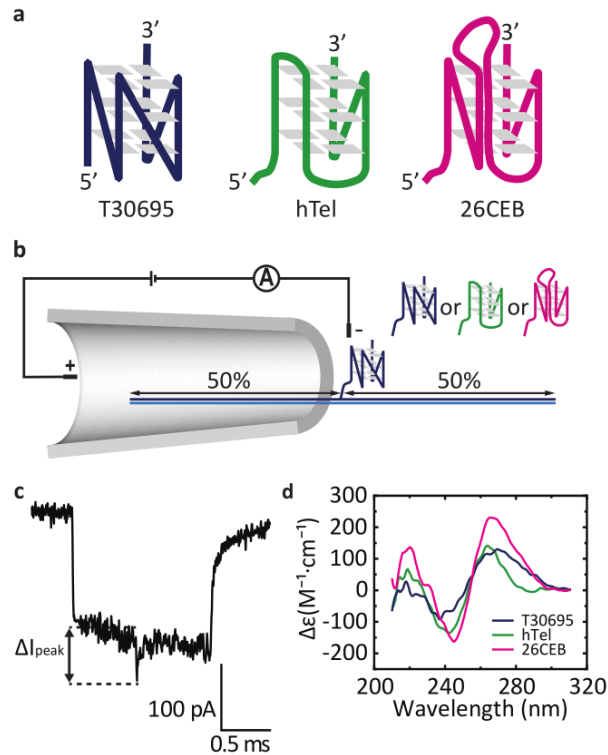

**Figure 1.** Experimental setup of single-molecule G-quadruplex nanopore assay (smGNA). a) The G-quadruplex structures used in this study are illustrated. b) A DNA carrier with Gq placed in the middle translocates through a nanopore. Other Gqs can be placed in the same position. c) A sample event of the DNA carrier design from b) is shown. The peak in the middle represents T30695 Gq with respective peak current drop ( $\Delta I_{\text{peak}}$ ). d) Circular dichroism spectra of the three Gq structures in measurement buffer containing 4 M LiCl, 100 mM KCl, 1×TE.

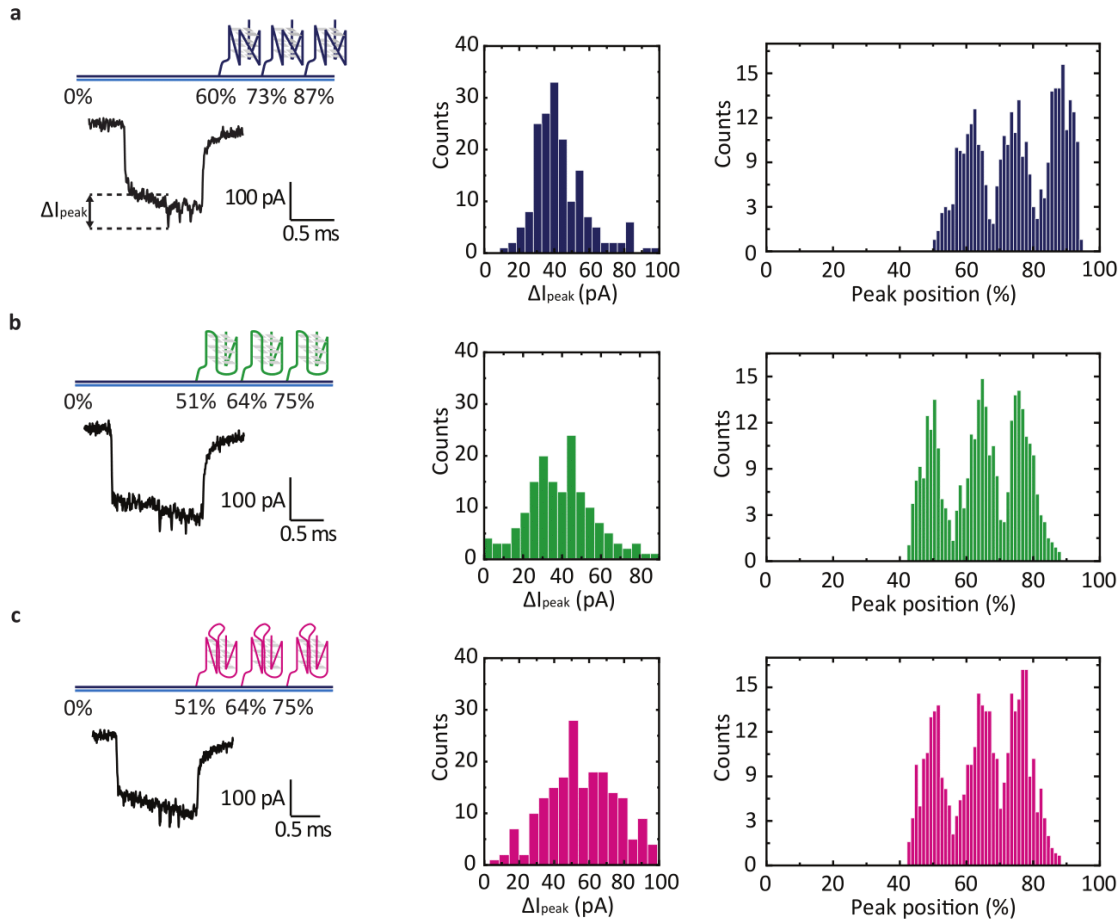

**Figure 2.** Single-molecule G-quadruplex nanopore assay (smGNA) detects various G-quadruplexes (Gqs) without labelling. Three Gqs are placed at the designed positions as a percentage of the whole DNA carrier (left panel). The current drops  $\Delta I_{\text{peak}}$  of Gq peaks are shown in the middle. Relative peak positions are shown in the right panel. a) Three peaks of T30695 can be observed with small diameter nanopores ( $\sim 5$  nm). Relative peak positions match the designed positions. The similar design with three Gqs at the different positions is shown for b) human telomere Gq and c) 26CEB Gq.

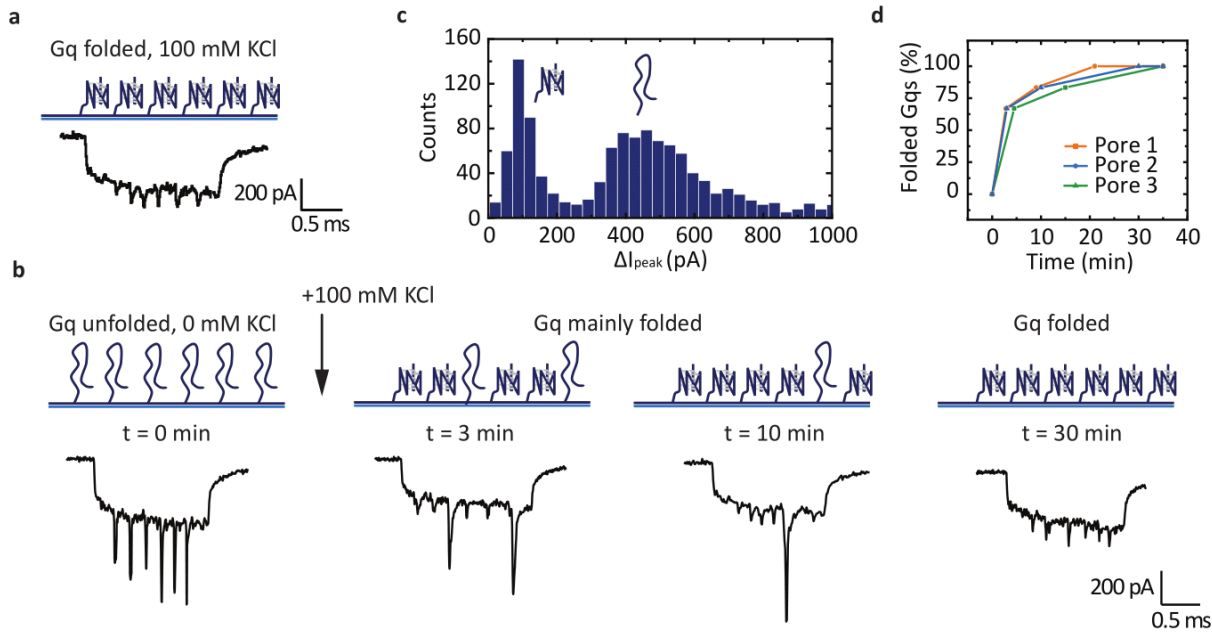

**Figure 3.** smGNA discriminates unfolded and folded G-quadruplex (Gq). Each peak represents one T30695 Gq attached to DNA carrier. a) Gq pre-folded in 100 mM potassium chloride (KCl) in a nanopore measurement shows only folded Gqs. b) Unfolded Gq in the absence of KCl induces deep peaks at the beginning of the measurement indicate unfolded GQ. Upon addition of unfolded Gqs in measurement buffer with 100 mM KCl, Gqs start to fold. In the first 3 minutes of measurement, the clear majority of Gqs are folded. Nanopores detect unfolded Gq even after 10 minutes. The period of 30 minutes is required for folding of all Gqs. c) We can observe the clear difference between folded and unfolded Gqs from the current drop of peaks ( $\Delta I_{\text{peak}}$ ). The lower  $\Delta I_{\text{peak}}$  is attributed to folded Gqs and higher current drop are coming from unfolded Gq i.e. single-stranded DNA. d) Single-molecule kinetics of Gq folding for different nanopores is presented.

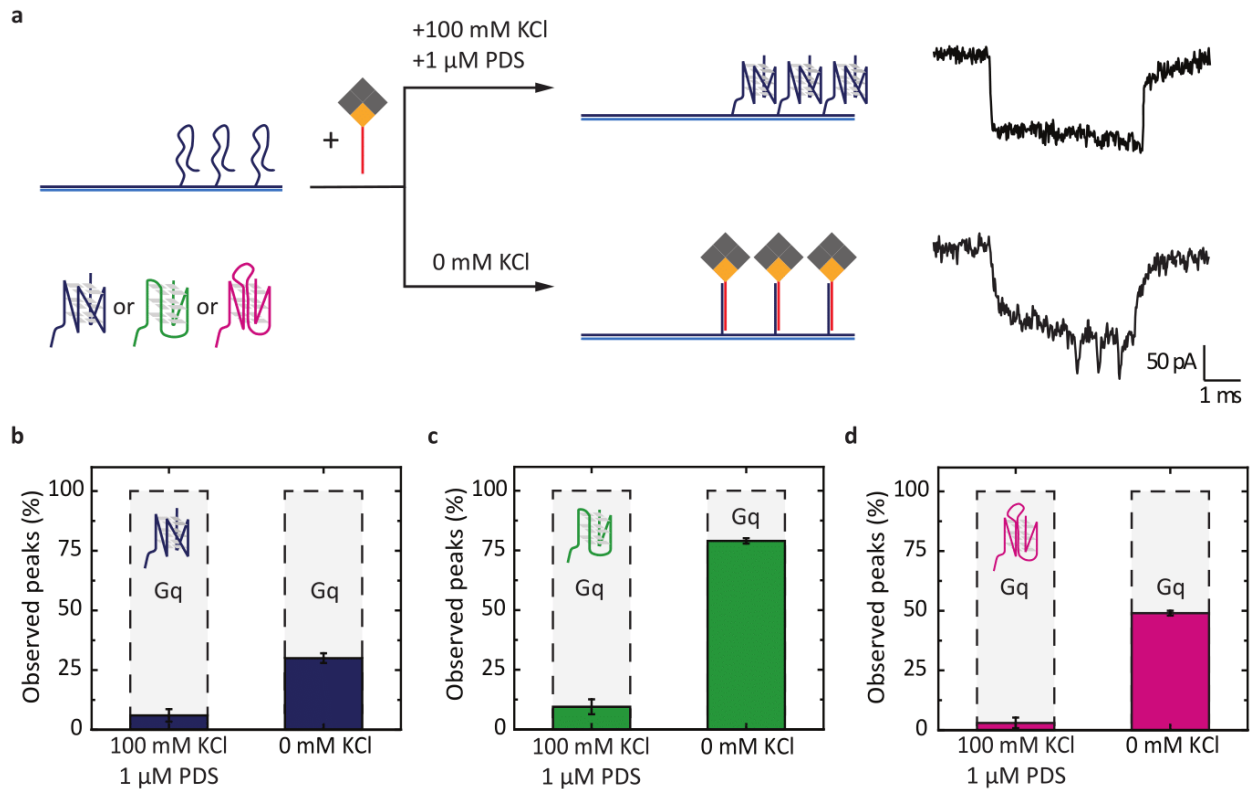

**Figure 4.** smGNA quantifies quadruplex-duplex competition. a) In the presence of Gq stabilizing conditions including 1 μM high-specific ligand pyridostatin (PDS) and 100 mM KCl majority of Gq are folded (left panel) even in presence of complementary strand in the same concentration. In the absence of stabilizing conditions (0 mM KCl, PDS) duplex forms in different duplex are formed and peaks are observed indicating duplex formation. The events a) are examples for T30695 in both conditions. b) Histograms of percentages of observed peaks for T30695 Gq show that even without stabilizing conditions duplex formation is limited. c) Histogram of observed peaks of hTel duplex formation is significantly promoted without stabilizing conditions and observed peaks are around 79%. d) 26CEB Gq show a similar percentage of folded Gqs as T30695 in stabilizing conditions. For all experiments, Gq and respective complementary strand are mixed in equimolar concentrations. The columns outlined with dashed lines represents folded Gqs. The error bars represent  $\pm$  standard error mean.

## ASSOCIATED CONTENT

**Supporting Information.** In detail nanopores fabrication and chip assembly protocol, nanopore statistics, DNA carrier assembly, sequences used in this study, details of CD measurements, sample events and data analysis are presented (PDF).

## Corresponding Author

\*E-mail: [ufk20@cam.ac.uk](mailto:ufk20@cam.ac.uk)

## Author Contributions

The manuscript was written through the contributions of all authors. All authors have given approval of the final version of the manuscript. ‡These authors contributed equally.

## ACKNOWLEDGMENT

The authors thank Dr Julian Sale and his group, Medical Research Council, Laboratory of Molecular Biology for providing the PDS ligand. The authors thank the Howarth Lab Oxford for the monovalent streptavidin. We are grateful for the help to Catherine Wu for access to CD machines, Department of Chemistry, University of Cambridge. N. Ermann and A. Ohmann are acknowledged for critical reading of the manuscript. F.B., K.C. and U.F.K. acknowledge funding from an ERC Consolidator Grant (Designerpores no. 647144). F.B. acknowledges funding from Benefactors' Scholarship and scholars' research expense scheme from St John's College, Cambridge, United Kingdom, and J.Z. acknowledges funding from an EPSRC grant (EP/M008258/1).

## ABBREVIATIONS

Gq, G-quadruplex; PDS, pyridostatin; duplex-sb, duplex-streptavidin-biotin complex; hTel, human telomere G-quadruplex.

## REFERENCES

1. Biffi G, Tannahill D, McCafferty J, Balasubramanian S. Quantitative visualization of DNA G-quadruplex structures in human cells. *Nat Chem.* 2013;5(3):182-186. doi:10.1038/nchem.1548
2. Kwok CK, Merrick CJ. G-Quadruplexes: Prediction, Characterization, and Biological Application. *Trends Biotechnol.* 2017;35(10):997-1013. doi:10.1016/j.tibtech.2017.06.012
3. Williamson JR, Raghuraman MK, Cech TR. Monovalent cation-induced structure of telomeric DNA: The G-quartet model. *Cell.* 1989;59(5):871-880. doi:10.1016/0092-8674(89)90610-7
4. Rhodes D, Lipps HJ. G-quadruplexes and their regulatory roles in biology. *Nucleic Acids Res.* 2015;43(18):8627-8637. doi:10.1093/nar/gkv862
5. Bochman ML, Paeschke K, Zakian VA. DNA secondary structures: stability and function of G-quadruplex structures. *Nat Rev Genet.* 2012;13(11):770-780. doi:10.1038/nrg3296
6. Siddiqui-Jain A, Grand CL, Bearss DJ, Hurley LH. Direct evidence for a G-quadruplex in a promoter region and its targeting with a small molecule to repress c-MYC transcription. *Proc Natl Acad Sci.* 2002;99(18):11593-11598. doi:10.1073/pnas.182256799
7. Armas P, David A, Calcaterra NB. Transcriptional control by G-quadruplexes: In vivo roles and perspectives for specific intervention. *Transcription.* 2017;8(1):21-25. doi:10.1080/21541264.2016.1243505
8. Chambers VS, Marsico G, Boutell JM, Di Antonio M, Smith GP, Balasubramanian S. High-throughput sequencing of DNA G-quadruplex structures in the human genome. *Nat Biotechnol.* 2015;33(8):877-881. doi:10.1038/nbt.3295
9. Wu Y, Brosh RM. G-quadruplex nucleic acids and human disease. *FEBS J.* 2010;277(17):3470-3488. doi:10.1111/j.1742-4658.2010.07760.x
10. Wolfe AL, Singh K, Zhong Y, et al. RNA G-quadruplexes cause eIF4A-dependent oncogene translation in cancer. *Nature.* 2014;513(7516):65-70. doi:10.1038/nature13485
11. Wang S-R, Zhang Q-Y, Wang J-Q, Ge X-Y, Song Y-Y, Wang Y-F, Li X-D, Fu B-S, Xu G-H, Shu B, Gong P, Zhang B, Tian T, Zhou X. Chemical Targeting of a G-Quadruplex RNA in the Ebola Virus L Gene. *Cell Chem Biol.* 2016;23(9):1113-1122. doi:10.1016/J.CHEMBIOL.2016.07.019
12. Perrone R, Nadai M, Frasson I, Poe JA, Butovskaya E, Smithgall TE, Palumbo M, Palù G,

- Richter SN. A Dynamic G-Quadruplex Region Regulates the HIV-1 Long Terminal Repeat Promoter. *J Med Chem.* 2013;56(16):6521-6530. doi:10.1021/jm400914r
13. Zhang AYQ, Balasubramanian S. The kinetics and folding pathways of intramolecular G-quadruplex nucleic acids. *J Am Chem Soc.* 2012;134(46):19297-19308. doi:10.1021/ja309851t
  14. Tateishi-Karimata H, Kawauchi K, Sugimoto N. Destabilization of DNA G-Quadruplexes by Chemical Environment Changes during Tumor Progression Facilitates Transcription. *J Am Chem Soc.* 2018;140(2):642-651. doi:10.1021/jacs.7b09449
  15. Merkina EE, Fox KR. Kinetic stability of intermolecular DNA quadruplexes. *Biophys J.* 2005;89(1):365-373. doi:10.1529/biophysj.105.061259
  16. De Rache A, Mergny J-L. Assessment of selectivity of G-quadruplex ligands via an optimised FRET melting assay. *Biochimie.* 2015;115:194-202. doi:10.1016/J.BIOCHI.2015.06.002
  17. Neidle S, Balasubramanian S, eds. *Quadruplex Nucleic Acids*. Cambridge: Royal Society of Chemistry; 2006. doi:10.1039/9781847555298
  18. Tippana R, Xiao W, Myong S. G-quadruplex conformation and dynamics are determined by loop length and sequence. *Nucleic Acids Res.* 2014;42(12):8106-8114. doi:10.1093/nar/gku464
  19. Bonnet G, Krichevsky O, Libchaber A. Kinetics of conformational fluctuations in DNA hairpin-loops. *Proc Natl Acad Sci U S A.* 1998;95(15):8602-8606. doi:10.1073/pnas.95.15.8602
  20. Shim J, Gu L-Q. Single-molecule investigation of G-quadruplex using a nanopore sensor. *Methods.* 2012;57(1):40-46. doi:10.1016/j.ymeth.2012.03.026
  21. An N, Fleming AM, Middleton EG, Burrows CJ. Single-molecule investigation of G-quadruplex folds of the human telomere sequence in a protein nanocavity. *Proc Natl Acad Sci.* 2014;111(40):14325-14331. doi:10.1073/pnas.1415944111
  22. Goto Y, Yanagi I, Matsui K, Yokoi T, Takeda K. Identification of four single-stranded DNA homopolymers with a solid-state nanopore in alkaline CsCl solution. *Nanoscale.* 2018;10(44):20844-20850. doi:10.1039/C8NR04238A
  23. Si W, Yang H, Sha J, Zhang Y, Chen Y. Discrimination of single-stranded DNA homopolymers by sieving out G-quadruplex using tiny solid-state nanopores.

- Electrophoresis*. February 2019. doi:10.1002/elps.201800537
24. Kim M, Kreig A, Lee C-Y, Rube HT, Calvert J, Song JS, Myong S. Quantitative analysis and prediction of G-quadruplex forming sequences in double-stranded DNA. *Nucleic Acids Res.* 2016;44(10):4807-4817. doi:10.1093/nar/gkw272
  25. Zheng K, Chen Z, Hao Y, Tan Z. Molecular crowding creates an essential environment for the formation of stable G-quadruplexes in long double-stranded DNA. *Nucleic Acids Res.* 2010;38(1):327-338. doi:10.1093/nar/gkp898
  26. Li W, Miyoshi D, Nakano S-I, Sugimoto N. Structural Competition Involving G-Quadruplex DNA and Its Complement †. *Biochemistry.* 2003;42:11736-11744. doi:10.1021/bi034168j
  27. Bell NAW, Keyser UF. Digitally encoded DNA nanostructures for multiplexed, single-molecule protein sensing with nanopores. *Nat Nanotechnol.* 2016;11(7):645-651. doi:10.1038/nnano.2016.50
  28. Chen K, Kong J, Zhu J, Ermann N, Predki P, Keyser UF. Digital Data Storage Using DNA Nanostructures and Solid-State Nanopores. *Nano Lett.* 2019;19(2):1210-1215. doi:10.1021/acs.nanolett.8b04715
  29. Bell NAW, Keyser UF. Specific Protein Detection Using Designed DNA Carriers and Nanopores. *J Am Chem Soc.* 2015;137(5):2035-2041. doi:10.1021/ja512521w
  30. Esposito V, Pirone L, Mayol L, Pedone E, Virgilio A, Galeone A. Exploring the binding of d(GGGT)<sub>4</sub> to the HIV-1 integrase: An approach to investigate G-quadruplex aptamer/target protein interactions. *Biochimie.* 2016;127:19-22. doi:10.1016/j.biochi.2016.04.013
  31. Neidle S, Parkinson GN. The structure of telomeric DNA. *Curr Opin Struct Biol.* 2003;13(3):275-283. doi:10.1016/S0959-440X(03)00072-1
  32. Amrane S, Adrian M, Heddi B, Serero A, Nicolas A, Mergny J-L, Tuân Phan A. Formation of Pearl-Necklace Monomorphic G-Quadruplexes in the Human CEB25 Minisatellite. *J Am Chem Soc.* 2012;134:5807-5816. doi:10.1021/ja208993r
  33. Kumar N, Sahoo B, Varun KAS, Maiti S, Maiti S. Effect of loop length variation on quadruplex-Watson Crick duplex competition. *Nucleic Acids Res.* 2008;36(13):4433-4442. doi:10.1093/nar/gkn402
  34. Bardin C, Leroy JL. The formation pathway of tetramolecular G-quadruplexes. *Nucleic Acids Res.* 2008;36(2):477-488. doi:10.1093/nar/gkm1050



35. Bhattacharyya D, Arachchilage GM, Basu S. Metal cations in G-quadruplex folding and stability. *Front Chem.* 2016;4(SEP):38. doi:10.3389/fchem.2016.00038
36. Kan Z, Yao Y, Wang P, Li X, Hao Y, Tan Z. Molecular Crowding Induces Telomere G-Quadruplex Formation under Salt-Deficient Conditions and Enhances its Competition with Duplex Formation. *Angew Chemie Int Ed.* 2006;45(10):1629-1632. doi:10.1002/anie.200502960
37. Howarth M, Chinnapen DJF, Gerrow K, Dorrestein PC, Grandy MR, Kelleher NL, El-Husseini A, Ting AY. A monovalent streptavidin with a single femtomolar biotin binding site. *Nat Methods.* 2006;3(4):267-273. doi:10.1038/nmeth861
38. Kumar N, Maiti S. The effect of osmolytes and small molecule on Quadruplex-WC duplex equilibrium: a fluorescence resonance energy transfer study. *Nucleic Acids Res.* 2005;33(21):6723-6732. doi:10.1093/nar/gki961
39. Koirala D, Dhakal S, Ashbridge B, Sannohe Y, Rodriguez R, Sugiyama H, Balasubramanian S, Mao H. A single-molecule platform for investigation of interactions between G-quadruplexes and small-molecule ligands. *Nat Chem.* 2011;3(10):782-787. doi:10.1038/nchem.1126
40. He F, Tang Y, Yu M, Feng F, An L, Sun H, Wang S, Li Y, Zhu D, Bazan GC. Quadruplex-to-duplex transition of G-rich oligonucleotides probed by cationic water-soluble conjugated polyelectrolytes. *J Am Chem Soc.* 2006;128(21):6764-6765. doi:10.1021/ja058075w
41. Li W, Wu P, Ohmichi T, Sugimoto N. Characterization and thermodynamic properties of quadruplex/duplex competition. *FEBS Lett.* 2002;526(1-3):77-81. doi:10.1016/S0014-5793(02)03118-6
